# Supplementary material for: Linker histones are fine-scale chromatin architects modulating developmental decisions in Arabidopsis
Source: PubMed Central journal article supplement (PMC6685187; doi:10.1186/s13059-019-1767-3), 2019-08-07
Supplement: 13059_2019_1767_MOESM4_ESM.pdf [file 13059_2019_1767_MOESM4_ESM.pdf]

**Supplemental Table 3. Classes of TEs up-regulated in *3h1*.**

| <b>Super Family</b> | <b>Whole genome<br/>number of TE (%)</b> | <b>Upregulated in <i>3h1</i> (Fch<math>\geq</math>2, P<math>\leq</math>0.05)<br/>number of TE (%)</b> |
|---------------------|------------------------------------------|-------------------------------------------------------------------------------------------------------|
| DNA/MuDR            | 5410 (13%)                               | 59 (13%)                                                                                              |
| LTR/Copia           | 1781 (42%)                               | 38 (8%)                                                                                               |
| DNA                 | 1829 (17%)                               | 13 (3%)                                                                                               |
| DNA/Mariner         | 151 (6%)                                 | 0 (0%)                                                                                                |
| DNA/En-Spm          | 941 (4%)                                 | 22 (5%)                                                                                               |
| LTR/Gypsy           | 4181 (3%)                                | 141 (31%)                                                                                             |
| DNA/HAT             | 1035 (6%)                                | 10 (2%)                                                                                               |
| DNA/Pogo            | 344 (3%)                                 | 2 (0%)                                                                                                |
| DNA/Harbinger       | 379 (1%)                                 | 6 (1%)                                                                                                |
| LINE/L1             | 1447 (1%)                                | 31 (7%)                                                                                               |
| RC/Helitron         | 12945 (0%)                               | 121 (27%)                                                                                             |
| SINE                | 131 (1%)                                 | 0 (0%)                                                                                                |
| DNA/Tc1             | 95 (0%)                                  | 0 (0%)                                                                                                |
| null                | 16 (0%)                                  | 1 (0%)                                                                                                |
| RathE1,2,3_cons     | 391 (0%)                                 | 6 (1%)                                                                                                |
| <b>All</b>          | <b>31076 (100%)</b>                      | <b>450 (100.0%)</b>                                                                                   |

**Supplemental Table S5. Gene Ontology (GO) analysis of genes which are misregulated in *3h1* mutant.**

| <b><u>Biological process</u></b>                   |                      |                |
|----------------------------------------------------|----------------------|----------------|
| <b>GO Term</b>                                     | <b>GO Annotation</b> | <b>p-value</b> |
| photosynthesis, light harvesting in photosystem I  | GO:0009768           | 5.59E-20       |
| photosynthesis                                     | GO:0015979           | 2.42E-17       |
| protein-chromophore linkage                        | GO:0018298           | 1.50E-16       |
| photosynthesis, light harvesting                   | GO:0009765           | 1.73E-16       |
| photosynthesis, light reaction                     | GO:0019684           | 7.89E-13       |
| generation of precursor metabolites and energy     | GO:0006091           | 5.51E-08       |
| response to light stimulus                         | GO:0009416           | 6.51E-08       |
| response to radiation                              | GO:0009314           | 1.62E-07       |
| response to abiotic stimulus                       | GO:0009628           | 5.20E-07       |
| chlorophyll biosynthetic process                   | GO:0015995           | 2.14222E-06    |
| porphyrin-containing compound biosynthetic process | GO:0006779           | 5.9281E-06     |
| tetrapyrrole biosynthetic process                  | GO:0033014           | 8.40871E-06    |
| response to far red light                          | GO:0010218           | 1.65334E-05    |
| chlorophyll metabolic process                      | GO:0015994           | 3.82708E-05    |
| response to red light                              | GO:0010114           | 4.06136E-05    |
| response to high light intensity                   | GO:0009644           | 0.000107761    |
| porphyrin-containing compound metabolic process    | GO:0006778           | 0.000114665    |
| tetrapyrrole metabolic process                     | GO:0033013           | 0.000119558    |
| response to blue light                             | GO:0009637           | 0.00021512     |
| response to light intensity                        | GO:0009642           | 0.000226407    |
| response to stimulus                               | GO:0050896           | 0.000376309    |
| response to red or far red light                   | GO:0009639           | 0.001070904    |
| response to low light intensity stimulus           | GO:0009645           | 0.005522224    |
| pigment biosynthetic process                       | GO:0046148           | 0.00574522     |
| protoporphyrinogen IX biosynthetic process         | GO:0006782           | 0.006858986    |
| protoporphyrinogen IX metabolic process            | GO:0046501           | 0.006858986    |
| response to chemical                               | GO:0042221           | 0.025952734    |
| pigment metabolic process                          | GO:0042440           | 0.026767756    |
| heme biosynthetic process                          | GO:0006783           | 0.04207751     |
| <b><u>Molecular function</u></b>                   |                      |                |
| <b>GO Term</b>                                     | <b>GO Annotation</b> | <b>p-value</b> |
| pigment binding                                    | GO:0031409           | 6.23E-19       |
| chlorophyll binding                                | GO:0016168           | 1.43E-16       |
| tetrapyrrole binding                               | GO:0046906           | 1.4425E-05     |
| oxidoreductase activity                            | GO:0016628           | 0.025587703    |
| <b><u>Cell compartment</u></b>                     |                      |                |
| <b>GO Term</b>                                     | <b>GO Annotation</b> | <b>p-value</b> |
| photosystem I                                      | GO:0009522           | 5.61E-27       |
| plastid thylakoid                                  | GO:0031976           | 5.67E-27       |
| chloroplast thylakoid                              | GO:0009534           | 7.79E-27       |

|                                                |            |             |
|------------------------------------------------|------------|-------------|
| thylakoid                                      | GO:0009579 | 2.31E-26    |
| photosystem                                    | GO:0009521 | 1.55E-25    |
| plastid thylakoid membrane                     | GO:0055035 | 3.20E-23    |
| chloroplast thylakoid membrane                 | GO:0009535 | 3.41E-23    |
| thylakoid membrane                             | GO:0042651 | 1.86E-22    |
| photosynthetic membrane                        | GO:0034357 | 1.97E-22    |
| chloroplast part                               | GO:0044434 | 3.96E-22    |
| thylakoid part                                 | GO:0044436 | 4.50E-22    |
| organelle subcompartment                       | GO:0031984 | 4.79E-22    |
| plastid part                                   | GO:0044435 | 1.32E-21    |
| plastoglobule                                  | GO:0010287 | 4.78E-20    |
| light-harvesting complex                       | GO:0030076 | 7.96E-18    |
| chloroplast envelope                           | GO:0009941 | 8.15E-18    |
| plastid envelope                               | GO:0009526 | 2.10E-17    |
| chloroplast stroma                             | GO:0009570 | 2.24E-14    |
| intracellular organelle part                   | GO:0044446 | 2.46E-14    |
| organelle part                                 | GO:0044422 | 2.81E-14    |
| photosystem II                                 | GO:0009523 | 4.52E-14    |
| plastid stroma                                 | GO:0009532 | 8.85E-14    |
| plastid                                        | GO:0009536 | 1.60E-13    |
| chloroplast                                    | GO:0009507 | 1.24E-12    |
| envelope                                       | GO:0031975 | 6.97E-12    |
| organelle envelope                             | GO:0031967 | 7.04E-12    |
| membrane protein complex                       | GO:0098796 | 1.38E-10    |
| membrane                                       | GO:0016020 | 6.96E-09    |
| cytoplasmic part                               | GO:0044444 | 1.12E-08    |
| cytoplasm                                      | GO:0005737 | 5.33E-07    |
| macromolecular complex                         | GO:0032991 | 8.12E-07    |
| photosystem I reaction center                  | GO:0009538 | 2.05082E-06 |
| protein complex                                | GO:0043234 | 0.000623038 |
| photosystem II antenna complex                 | GO:0009783 | 0.00338651  |
| membrane part                                  | GO:0044425 | 0.006706641 |
| integral component of membrane                 | GO:0016021 | 0.007946083 |
| chloroplast thylakoid membrane protein complex | GO:0098807 | 0.008141248 |
| intracellular ribonucleoprotein complex        | GO:0030529 | 0.013895558 |
| ribonucleoprotein complex                      | GO:1990904 | 0.013895558 |
| intrinsic component of membrane                | GO:0031224 | 0.016362585 |
| cell periphery                                 | GO:0071944 | 0.017709796 |
| cell-cell junction                             | GO:0005911 | 0.019623792 |
| cell junction                                  | GO:0030054 | 0.019623792 |
| cell part                                      | GO:0044464 | 0.019966572 |
| plasmodesma                                    | GO:0009506 | 0.020005906 |
| symplast                                       | GO:0055044 | 0.020005906 |
| cell                                           | GO:0005623 | 0.022080537 |
| chloroplast photosystem II                     | GO:0030095 | 0.022823861 |

|                                              |            |             |
|----------------------------------------------|------------|-------------|
| non-membrane-bounded organelle               | GO:0043228 | 0.022958631 |
| intracellular non-membrane-bounded organelle | GO:0043232 | 0.022958631 |
| cytosol                                      | GO:0005829 | 0.023594558 |
| organelle                                    | GO:0043226 | 0.025609296 |
| intracellular organelle                      | GO:0043229 | 0.025722053 |
| nucleolus                                    | GO:0005730 | 0.026025793 |
| ribosome                                     | GO:0005840 | 0.026106284 |
| cell wall                                    | GO:0005618 | 0.026886069 |
| external encapsulating structure             | GO:0030312 | 0.026886069 |
| chloroplast membrane                         | GO:0031969 | 0.031620021 |
| membrane-bounded organelle                   | GO:0043227 | 0.036306654 |
| intracellular membrane-bounded organelle     | GO:0043231 | 0.03641433  |
| plastid membrane                             | GO:0042170 | 0.036481998 |
| apoplast                                     | GO:0048046 | 0.041207145 |
| plasma membrane                              | GO:0005886 | 0.0462473   |
| cytosolic ribosome                           | GO:0022626 | 0.047006336 |

**Supplemental Table S6. Expression of histone modifying enzymes in *3h1*.**

| Gene name                               | Gene ID   | Total counts | P-value ( <i>3h1</i> vs. wt) | Ratio ( <i>3h1</i> vs. wt) | Fold change ( <i>3h1</i> vs. wt) |
|-----------------------------------------|-----------|--------------|------------------------------|----------------------------|----------------------------------|
| <b>HDAC - histone deacetylases</b>      |           |              |                              |                            |                                  |
| HDA19                                   | AT4G38130 | 4.55E+00     | 9.77E-01                     | 1.00E+00                   | 1.00E+00                         |
| HDA6                                    | AT5G63110 | 1.97E+00     | 9.01E-01                     | 9.52E-01                   | -1.05E+00                        |
| HDA7                                    | AT5G35600 | 1.03E-01     | 1.73E-01                     | 6.79E-01                   | -1.47E+00                        |
| HDA9                                    | AT3G44680 | 1.15E+00     | 9.63E-01                     | 1.01E+00                   | 1.01E+00                         |
| HDA5                                    | AT5G61060 | 2.75E+00     | 3.82E-04                     | 7.34E-01                   | -1.36E+00                        |
| HDA15                                   | AT3G18520 | 1.60E+00     | 9.33E-01                     | 1.07E+00                   | 1.07E+00                         |
| HDA18                                   | AT5G61070 | 1.19E+00     | 9.88E-04                     | 4.55E+00                   | 4.55E+00                         |
| HDA2                                    | AT5G26040 | 8.62E-01     | 9.97E-01                     | 9.90E-01                   | -1.01E+00                        |
| HDA8                                    | AT1G08460 | 1.52E+00     | 4.71E-01                     | 8.86E-01                   | -1.13E+00                        |
| HDA14                                   | AT4G33470 | 2.91E+00     | 8.39E-01                     | 9.46E-01                   | -1.06E+00                        |
| HDA10                                   | AT3G44660 | na           | na                           | na                         | na                               |
| HDA17                                   | AT3G44490 | na           | na                           | na                         | na                               |
| HD2A                                    | AT3G44750 | 1.55E+00     | 6.90E-01                     | 9.54E-01                   | -1.05E+00                        |
| HD2B                                    | AT5G22650 | 3.73E+00     | 1.48E-01                     | 1.21E+00                   | 1.21E+00                         |
| HD2C                                    | AT5G03740 | 2.75E+00     | 3.77E-01                     | 8.92E-01                   | -1.12E+00                        |
| HD2D                                    | AT2G27840 | 9.24E-01     | 3.98E-01                     | 1.17E+00                   | 1.17E+00                         |
| SRT1                                    | AT5G55760 | 5.31E-01     | 5.03E-01                     | 1.15E+00                   | 1.15E+00                         |
| SRT2                                    | AT5G09230 | 8.57E-01     | 8.07E-01                     | 9.38E-01                   | -1.07E+00                        |
| <b>HAT - histone acetyltransferases</b> |           |              |                              |                            |                                  |
| HAC1                                    | AT1G79000 | 1.12E+01     | 4.58E-01                     | 9.02E-01                   | -1.11E+00                        |
| HAC2                                    | AT1G67220 | 2.24E+00     | 3.02E-04                     | 2.25E+00                   | 2.25E+00                         |
| HAC4                                    | AT1G55970 | 1.45E+00     | 9.84E-01                     | 9.78E-01                   | -1.02E+00                        |
| HAC5                                    | AT3G12980 | 6.24E+00     | 3.78E-01                     | 8.99E-01                   | -1.11E+00                        |
| HAC12                                   | AT1G16710 | 7.25E+00     | 5.38E-01                     | 9.37E-01                   | -1.07E+00                        |
| HAF1                                    | AT1G32750 | 1.01E+01     | 5.33E-01                     | 1.03E+00                   | 1.03E+00                         |
| HAF2                                    | AT3G19040 | 6.40E-01     | 6.91E-01                     | 1.37E+00                   | 1.37E+00                         |
| HAG1                                    | AT3G54610 | 6.16E-01     | 1.13E-01                     | 1.44E+00                   | 1.44E+00                         |
| HAG2                                    | AT5G56740 | 1.46E+00     | 8.46E-01                     | 9.74E-01                   | -1.03E+00                        |
| HAG3                                    | AT5G50320 | 2.15E+00     | 9.48E-01                     | 1.01E+00                   | 1.01E+00                         |
| HAG4                                    | AT5G64610 | 2.31E+00     | 3.37E-01                     | 1.04E+00                   | 1.04E+00                         |
| HAG5                                    | AT5G09740 | 9.90E-01     | 8.52E-01                     | 1.01E+00                   | 1.01E+00                         |
| <b>HMT - Histone methyltransferases</b> |           |              |                              |                            |                                  |
| CLF                                     | AT2G23380 | na           | na                           | na                         | na                               |
| SWN                                     | AT4G02020 | 4.41E+00     | 6.76E-01                     | 1.06E+00                   | 1.06E+00                         |
| MEA                                     | AT1G02580 | 2.49E-01     | 3.12E-01                     | 1.68E+00                   | 1.68E+00                         |
| ASHH1/<br>SDG28                         | AT1G76710 | 8.92E-01     | 7.30E-01                     | 9.14E-01                   | -1.09E+00                        |
| ASHH2/<br>SDG8                          | AT1G77300 | 9.83E+00     | 7.30E-01                     | 1.05E+00                   | 1.05E+00                         |

|                              |           |          |          |          |           |
|------------------------------|-----------|----------|----------|----------|-----------|
| ASHH3                        | AT2G44150 | 1.05E+00 | 9.66E-01 | 9.80E-01 | -1.02E+00 |
| ASHH4                        | AT3G59960 | 1.36E-01 | 3.66E-01 | 1.07E+00 | 1.07E+00  |
| ASHR3/<br>SDG4               | AT4G30860 | 7.48E-01 | 1.69E-02 | 1.74E+00 | 1.74E+00  |
| ATX1                         | AT2G31650 | 1.38E+00 | 6.82E-01 | 9.13E-01 | -1.10E+00 |
| ATX2                         | AT1G05830 | 3.95E+00 | 3.65E-01 | 8.97E-01 | -1.11E+00 |
| ATX3                         | AT3G61740 | 1.50E+00 | 1.12E-01 | 1.37E+00 | 1.37E+00  |
| ATX4                         | AT4G27910 | 2.09E+00 | 1.90E-01 | 1.26E+00 | 1.26E+00  |
| ATX5                         | AT5G53430 | 2.30E+00 | 3.77E-01 | 8.18E-01 | -1.22E+00 |
| ATXR3                        | AT4G15180 | 1.30E+01 | 2.51E-01 | 9.10E-01 | -1.10E+00 |
| ATXR7                        | AT5G42400 | 5.34E+00 | 4.30E-01 | 1.09E+00 | 1.09E+00  |
| ATXR5                        | AT5G09790 | 2.83E-01 | 5.80E-01 | 1.21E+00 | 1.21E+00  |
| ATXR6                        | AT5G24330 | 2.12E-01 | 3.72E-01 | 1.56E+00 | 1.56E+00  |
| SUVH1                        | AT5G04940 | 2.28E+00 | 8.73E-01 | 1.01E+00 | 1.01E+00  |
| SUVH2                        | AT2G33290 | 1.45E+00 | 4.39E-02 | 1.58E+00 | 1.58E+00  |
| SUVH3                        | AT1G73100 | 2.22E+00 | 9.09E-01 | 1.01E+00 | 1.01E+00  |
| SUVH4                        | AT5G13960 | 8.94E-01 | 9.20E-02 | 1.54E+00 | 1.54E+00  |
| SUVH5                        | AT2G35160 | 1.05E+00 | 5.64E-01 | 1.22E+00 | 1.22E+00  |
| SUVH6                        | AT2G22740 | na       |          |          |           |
| SUVH7                        | AT1G17770 | 2.53E-01 | 3.59E-01 | 2.00E+00 | 2.00E+00  |
| SUVH8                        | AT2G24740 | na       |          |          |           |
| SUVH9                        | AT4G13460 | 4.29E+00 | 6.34E-01 | 9.75E-01 | -1.03E+00 |
| SUVR1                        | AT1G04050 | 7.16E-01 | 6.49E-04 | 3.15E+00 | 3.15E+00  |
| SUVR5                        | AT2G23740 | na       |          |          |           |
| SUVR2                        | AT5G43990 | 1.12E+00 | 7.54E-01 | 9.31E-01 | -1.07E+00 |
| SUVR3                        | AT3G03750 | 7.91E-01 | 5.08E-01 | 7.98E-01 | -1.25E+00 |
| SUVR4                        | AT3G04380 | 6.30E-01 | 3.96E-02 | 1.94E+00 | 1.94E+00  |
| <b>H3K27me3 demethylases</b> |           |          |          |          |           |
| ELF6/JMJ11                   | AT5G04240 | 5.44E+00 | 6.49E-01 | 9.59E-01 | -1.04E+00 |
| REF6/JMJ12                   | AT3G48430 | 6.18E+00 | 6.97E-01 | 1.06E+00 | 1.06E+00  |
| JMJ13                        | AT5G46910 | 1.29E+00 | 4.13E-01 | 1.24E+00 | 1.24E+00  |

*Genes showing “na” entry correspond to regions which were filtered out due to the Ler residual sequences around H1.3 locus. See Methods for more details.*
